# Supplementary material for: Constructing treatment selection rules based on an estimated treatment effect function: different approaches to take stochastic uncertainty into account have a substantial effect on performance
Source: Springer Nature journal article supplement (doi:10.1186/s12874-019-0805-x), 2019-08-01
Supplement: MOESM1 [file 17030948]

## Additional File 1: An equivalence between pointwise confidence bands for $\theta(\cdot)$ and $\theta^{-1}(\cdot)$

Let  $\text{CI}(x)$  denote a  $1 - \gamma$  pointwise confidence band for  $\theta(x)$ . For any  $\eta$  of the target space of  $\theta(\cdot)$  then  $\varphi_{\eta,x} := \mathbb{I}(\eta \notin \text{CI}(x))$  defines a level  $\gamma$  test for  $H_0 : \theta(x) = \eta$  and we have  $\text{CI}(x) = \{\eta \mid \varphi_{\eta,x} = 0\}$ . Now  $\theta(x) = \eta$  is equivalent to  $x \in \theta^{-1}(\eta)$ . Consequently,  $\varphi_{\eta,x}$  is a level  $\gamma$  test for  $H_0 : x \in \theta^{-1}(\eta)$ . Hence  $\tilde{\text{CI}}(\eta) := \{x \mid \varphi_{\eta,x} = 0\}$  is a confidence band for  $\theta^{-1}(\eta)$  in the sense that for any  $x \in \theta^{-1}(\eta)$  it holds that  $P(x \in \tilde{\text{CI}}(\eta)) \geq 1 - \gamma$ .
