# Supplementary material for: Constructing treatment selection rules based on an estimated treatment effect function: different approaches to take stochastic uncertainty into account have a substantial effect on performance
Source: Springer Nature journal article supplement (doi:10.1186/s12874-019-0805-x), 2019-08-01
Supplement: MOESM2 [file 17030948]

## Additional File 2: Construction of the pointwise and simultaneous confidence bands and the confidence interval of the roots

### Pointwise confidence bands

A pointwise  $1 - \gamma$  confidence band  $[l_p(x), u_p(x)]$  for  $\theta(x)$  has to satisfy the property  $P(\theta(x) \in [l_p(x), u_p(x)]) \geq 1 - \gamma$  for each  $x \in (0, 1)$ . It can be constructed using the fact that  $\hat{\theta}(x)$  is a linear function of  $\hat{\beta}$  and  $\beta$  is part of the regression parameter vector  $(\alpha, \beta)$  of the models presented in Section 5. The design matrix  $\mathbf{X}$  of these models can be expressed as

$$\mathbf{X} = \begin{pmatrix} \mathbf{X}_1 & \mathbf{X}_1 \\ \mathbf{X}_0 & 0 \end{pmatrix}$$

with

$$\mathbf{X}_0 = \begin{pmatrix} 1 & x_1 \\ \vdots & \vdots \\ 1 & x_{n_0} \end{pmatrix} \quad \text{or} \quad \mathbf{X}_0 = \begin{pmatrix} 1 & x_1 & x_1^2 \\ \vdots & \vdots & \vdots \\ 1 & x_{n_0} & x_{n_0}^2 \end{pmatrix},$$

where  $x_i$  is the covariate value of the  $i$ -th patient among the  $n_0$  patients with  $T = 0$ , and  $\mathbf{X}_1$  is defined analogously with the covariate values of the patients with  $T = 1$ . Following Liu (2011), we have

$$[l_p(x), u_p(x)] = [\mathbf{x}'\hat{\beta} \pm t_{n-2(p+1)}^{\gamma/2} \hat{\sigma} \sqrt{\mathbf{x}'\Delta\mathbf{x}}]$$

where  $p$  is the number of covariates, i.e.  $p = 1$  in the linear analysis model or  $p = 2$  in the quadratic analysis model, respectively,  $\mathbf{x} = (1, x)$  or  $\mathbf{x} = (1, x, x^2)$ ,  $\hat{\beta} = (\hat{\beta}_0, \hat{\beta}_1)$  or  $\hat{\beta} = (\hat{\beta}_0, \hat{\beta}_1, \hat{\beta}_2)$ ,  $\Delta = (\mathbf{X}_1\mathbf{X}_1')^{-1} - (\mathbf{X}_0\mathbf{X}_0')^{-1}$  and  $\hat{\sigma}$  is the estimator of the standard deviation  $\sigma$  of the error variance, i.e.  $\hat{\sigma} = \sqrt{\|\mathbf{Y} - \mathbf{X}(\hat{\alpha}, \hat{\beta})\|^2 / (n - 2(p + 1))}$ , where  $\mathbf{Y} = (y_1, \dots, y_n)$  with  $y_i$  being the outcome of the  $i$ -th patient when ordered in correspondence with the design matrix.  $t_n^\alpha$  denotes the upper  $\alpha$ -quantile of a t-distribution with  $n$  degrees of freedom.

### Simultaneous confidence bands

A simultaneous  $1 - \gamma$  confidence band  $[l_p(x), u_p(x)]$  for  $\theta(x)$  has to satisfy the property  $P(\theta(x) \in [l_p(x), u_p(x)] \text{ for all } x \in (0, 1)) \geq 1 - \gamma$ . Simultaneous confidence bands can be constructed by blowing up the pointwise confidence bands until this property is reached. So the bands have the form

$$[l_s(x), u_s(x)] = [\mathbf{x}'\hat{\beta} \pm c\hat{\sigma} \sqrt{\mathbf{x}'\Delta\mathbf{x}}] \quad (1)$$

with some constant  $c$  which has to be chosen accordingly. Following Liu (2011), in the case of a linear analysis model  $c$  has to solve the equation

$$\gamma = \frac{\phi}{\pi} \left(1 + \frac{c^2}{(n-2)}\right)^{-(n-2)/2} - \frac{2}{\pi} \int_0^{(\pi-\phi)/2} \left(1 + \frac{c^2}{(n-2)\sin^2(\Theta + \phi/2)}\right)^{-(n-2)/2} d\Theta$$

where  $\cos \phi = (1, 0)' \Delta (1, 1) / \sqrt{(1, 0)' \Delta (1, 0) (1, 1)' \Delta (1, 1)}$ . We solve the equation by numerically approximating the integral using the trapezoidal rule and determining the solution numerically by using the bisection method.

In the case of a quadratic analysis model, we follow Knafel et al. (1985) and consider a grid  $(x_1, \dots, x_{1000})$  of  $x$ -values on the interval  $(0,1)$ . As each  $\hat{\theta}(x)$  is a linear function of  $\hat{\beta}$ , we can compute the covariance matrix of  $\hat{\theta}(x_1), \dots, \hat{\theta}(x_{1000})$ . We then determine  $c$  by generating 10,000 draws from the corresponding multivariate normal distribution and looking for the largest value of  $c$  such that (1) holds. Note that we can assume an arbitrary value of the mean values, i.e. of  $\theta(x)$ , in these computations.

## Confidence intervals for the roots

We estimate the roots of  $\theta(x)$  by considering  $h_\eta(\hat{\beta}) := \theta_{\hat{\beta}}^{-1}(\eta)$  and determining the set  $h_0(\hat{\beta})$ .

In the case of two roots, we can express  $h_0$  as two single valued functions  $h_0^1(\hat{\beta})$  and  $h_0^2(\hat{\beta})$  of  $\hat{\beta}$ , such that  $x_r^j = h_0^j(\hat{\beta})$ ; otherwise,  $h_0$  is already single valued and we have  $x_r = h_0(\hat{\beta})$ . Since  $h_0^j$  and  $h_0$  are continuous and differentiable in  $\hat{\beta}$ , we can use the delta rule to determine approximately the variance of the roots, and hence can construct confidence intervals assuming a normal distribution of the roots.

In the case of a linear analysis model, we have a single root  $x_r = -\frac{\beta_0}{\beta_1}$ . In the case of a quadratic analysis model, we have no root, if  $\beta_1^2 - 4\beta_0\beta_2 < 0$ , a single root  $x_r = -\beta_1/2\beta_2$  if  $\beta_1^2 - 4\beta_0\beta_2 = 0$ , or two roots  $x_r = (-\beta_1 \pm \sqrt{\beta_1^2 - 4\beta_0\beta_2})/2\beta_2$  otherwise. In the latter case we ignored roots outside of the interval  $(-0.25, 1.25)$  in applying CIR, as such roots are often associated with wide CIs covering the whole interval  $(0,1)$ .

## References

- Knafel, G., Sacks, J., Ylvisaker, D.: Confidence bands for regression-functions. *Journal of the American Statistical Association* **80**(391), 683–691 (1985)
- Liu, W.: *Simultaneous Inference in Regression*. CRC Press, Boca Raton (2011)
