# Supplementary material for: Constructing treatment selection rules based on an estimated treatment effect function: different approaches to take stochastic uncertainty into account have a substantial effect on performance
Source: Springer Nature journal article supplement (doi:10.1186/s12874-019-0805-x), 2019-08-01
Supplement: MOESM3 [file 17030948]

### Additional File 3: Calculation of quality measures

Let  $f_{X^*}$  be the density function of  $X^*$ . Let  $C_T = \{x \mid \theta(x) \geq 0\}$ . Then we can express sensitivity, specificity and overall gain as

$$\begin{aligned} \text{Sensitivity} &= P(X^* \in C \mid \theta(X^*) \geq 0) = P(X^* \in C \cap \theta(X^*) \geq 0) / P(\theta(X^*) \geq 0) \\ &= \int_{C \cap C_T} f_{X^*}(x) dx / \int_{C_T} f_{X^*}(x) dx \end{aligned}$$

$$\begin{aligned} \text{Specificity} &= P(X^* \notin C \mid \theta(X^*) < 0) = P(X^* \notin C \cap \theta(X^*) < 0) / P(\theta(X^*) < 0) \\ &= \int_{\overline{C} \cap \overline{C_T}} f_{X^*}(x) dx / \int_{\overline{C_T}} f_{X^*}(x) dx \end{aligned}$$

$$\text{Overall gain} = E(\theta(X^*) \mathbb{1}_{X^* \in C}) = \int_C \theta(x) f_{X^*}(x) dx$$

Since for all construction methods and all choices of  $\theta(x)$  the sets  $C, C_T$  and their complements can be written as the union of a finite number of disjoint intervals, we need only to consider how to compute  $\int_{(a,b)} f_{X^*}(x) dx$  and  $\int_{(a,b)} \theta(x) f_{X^*}(x) dx$ . For the special cases of  $\theta(x)$  to be linear or quadratic, we can derive explicit formulas for these integrals; the corresponding formulas are shown in the following table:

|                                     | $\int_{(a,b)} f_{X^*}(x) dx$                  | $\int_{(a,b)} \theta(x) f_{X^*}(x) dx$                      |
|-------------------------------------|-----------------------------------------------|-------------------------------------------------------------|
| $X \sim U(0, 1)$                    | $b - a$                                       |                                                             |
| $\theta(x) = \beta(x - 0.5)$        |                                               | $\beta/2((b^2 - a^2) - (b - a))$                            |
| $\theta(x) = \beta(l + m(x + n)^2)$ |                                               | $\beta((l + mn^2)(b - a) + mn(b^2 - a^2) + m/3(b^3 - a^3))$ |
| $X \sim T(0, 1, 1/3)$               |                                               |                                                             |
| $\theta(x) = \beta(x - 0.5)$        |                                               |                                                             |
| case 1: $1/3 < a < b$               | $3(b - a) - 3/2(b^2 - a^2)$                   | $\beta(-3/2(b - a) + 9/4(b^2 - a^2) - (b^3 - a^3))$         |
| case 2: $a < b \leq 1/3$            | $3(b^2 - a^2)$                                | $\beta(2(b^3 - a^3) - 3/2(b^2 - a^2))$                      |
| case 3: $a \leq 1/3 < b$            | $3((1/9 - a^2) + (b - 1/3) - 1/2(b^2 - 1/9))$ | $\beta(7/36 - 2a^3 + 3/2a^2 - 3/2b + 9/4b^2 - b^3)$         |
