# Supplementary material for: Constructing treatment selection rules based on an estimated treatment effect function: different approaches to take stochastic uncertainty into account have a substantial effect on performance
Source: Springer Nature journal article supplement (doi:10.1186/s12874-019-0805-x), 2019-08-01
Supplement: MOESM6 [file 17030948]

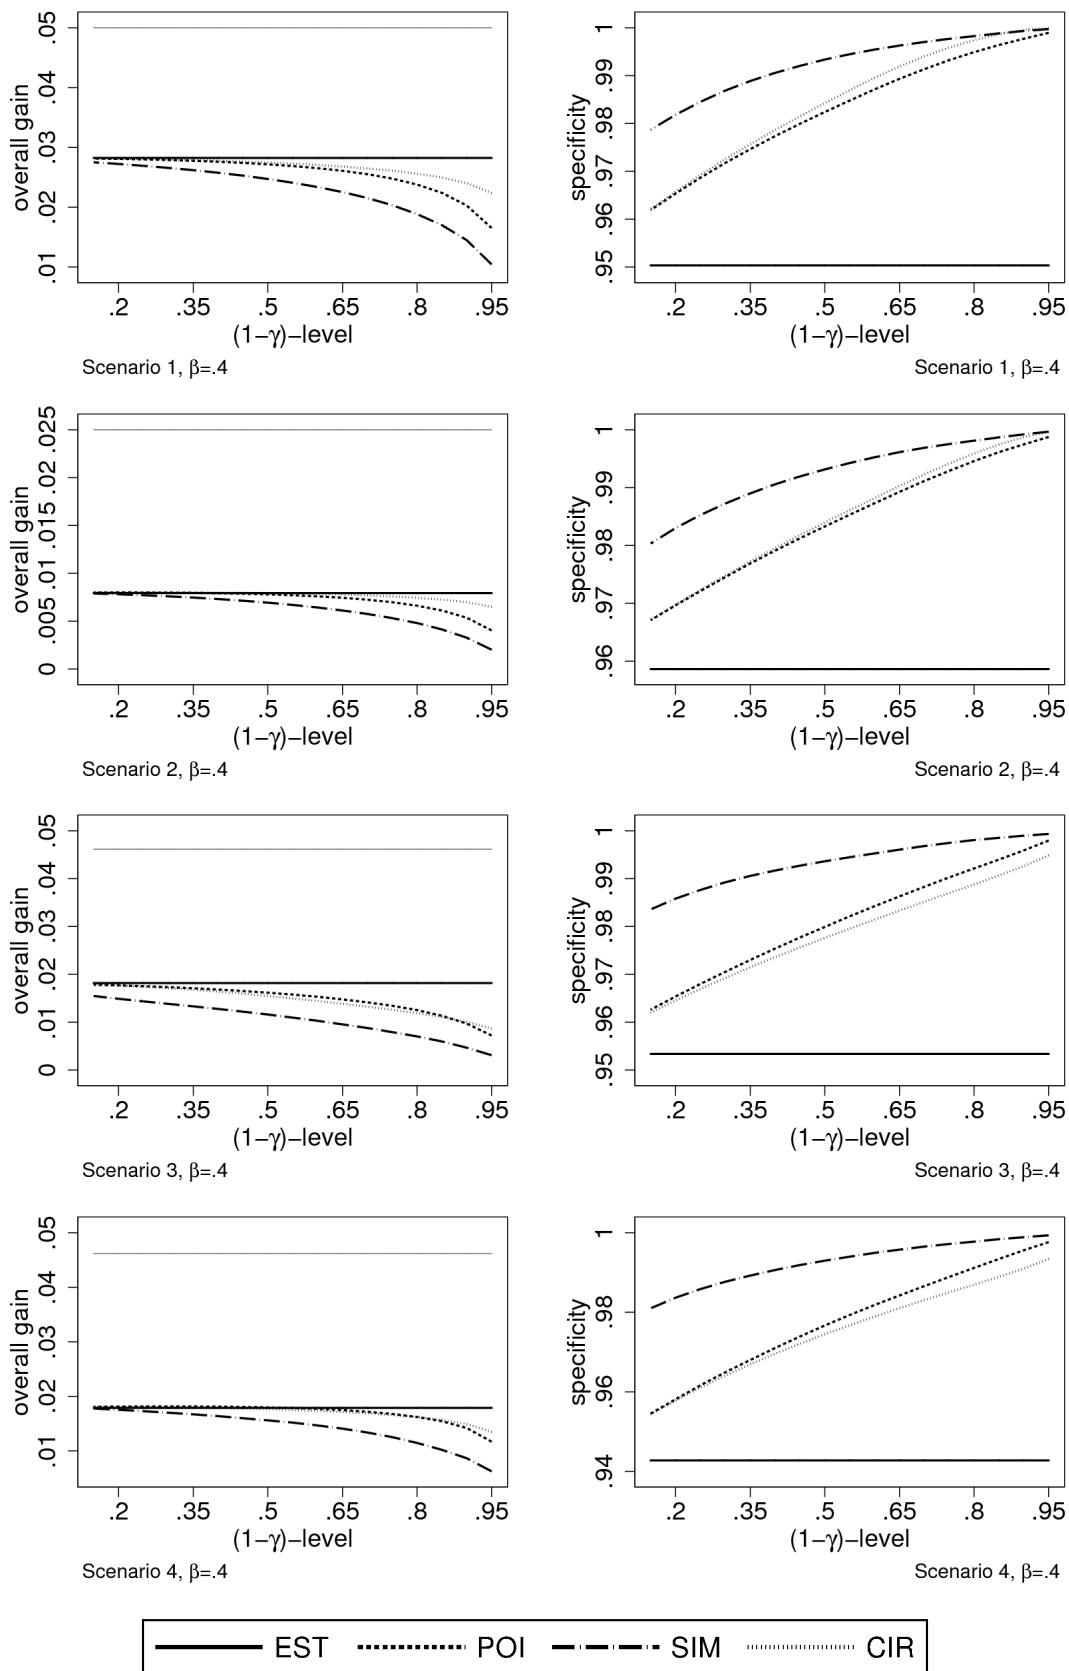

Figure Additional File 6a: Simulation results of overall gain and specificity for  $\beta = 0.4$  in dependence of the  $(1 - \gamma)$ -level. Shown are all four scenarios individually. The first two scenarios are analysed using a linear model, the latter two using a quadratic model. For the overall gain, the thin grey line indicates the maximally possible overall gain.

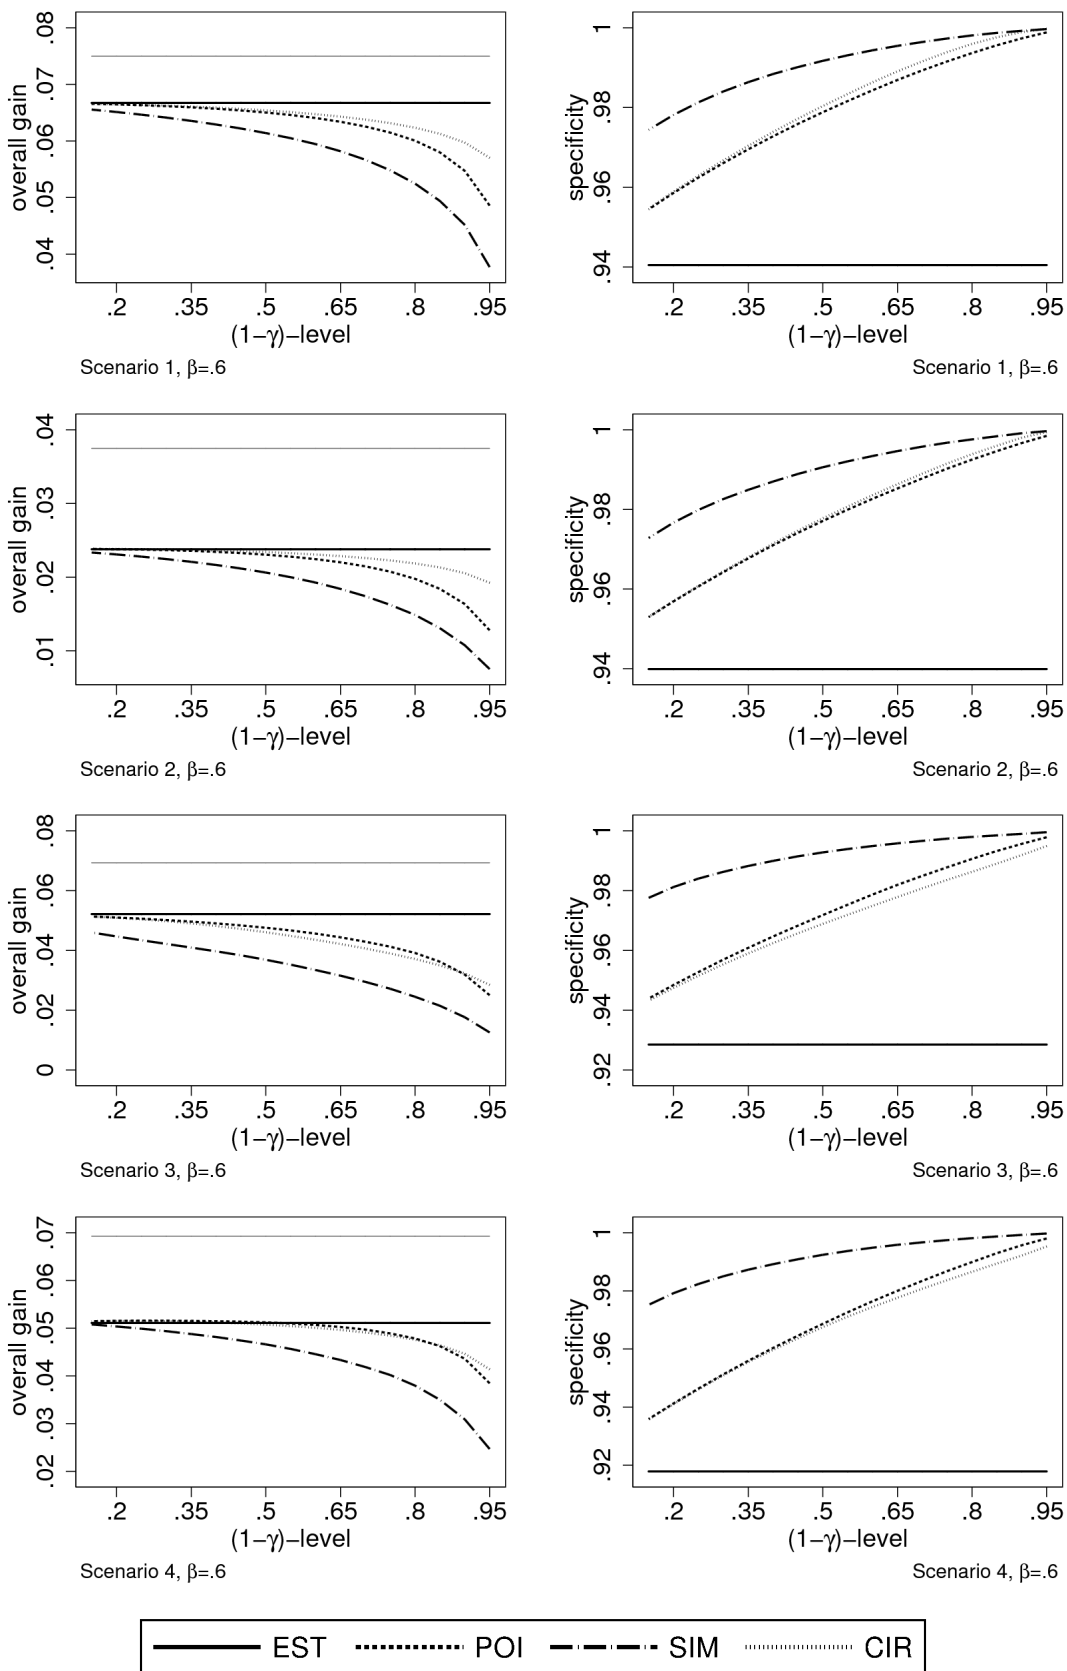

Figure Additional File 6b: Simulation results of overall gain and specificity for  $\beta = 0.6$  in dependence of the  $(1 - \gamma)$ -level. Shown are all four scenarios individually. The first two scenarios are analysed using a linear model, the latter two using a quadratic model. For the overall gain, the thin grey line indicates the maximally possible overall gain.

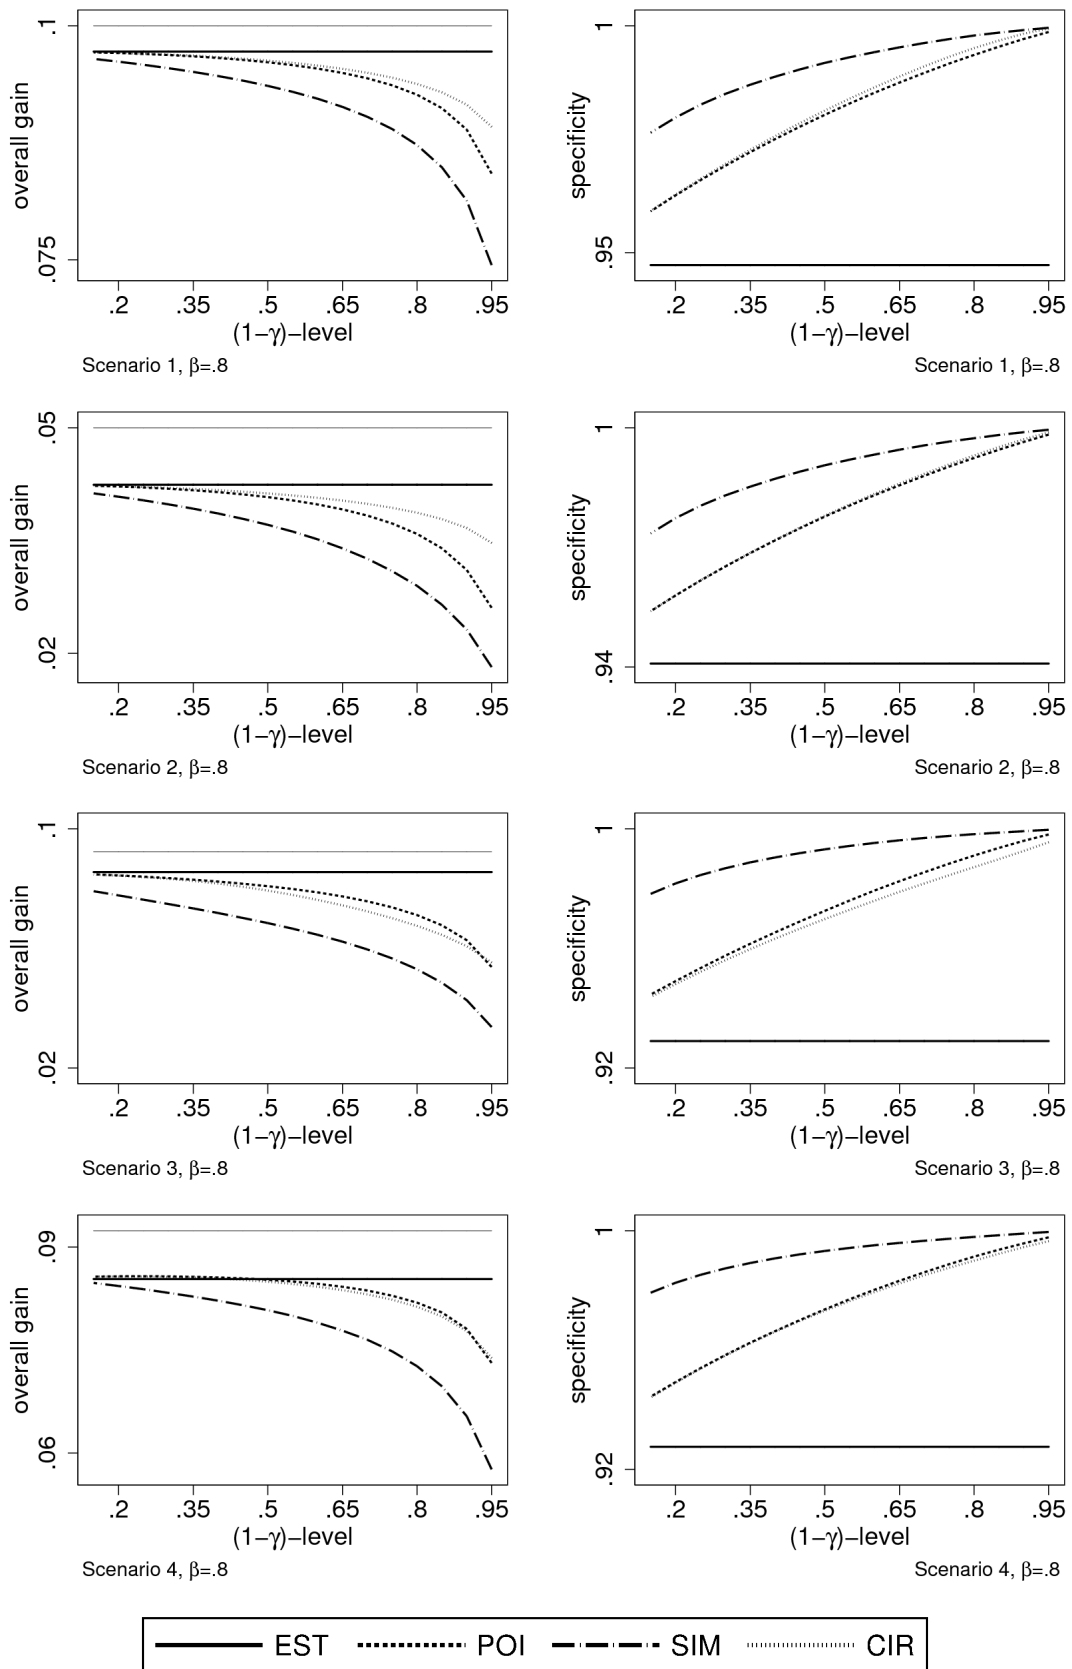

Figure Additional File 6c: Simulation results of overall gain and specificity for  $\beta = 0.8$  in dependence of the  $(1 - \gamma)$ -level. Shown are all four scenarios individually. The first two scenarios are analysed using a linear model, the latter two using a quadratic model. For the overall gain, the thin grey line indicates the maximally possible overall gain.

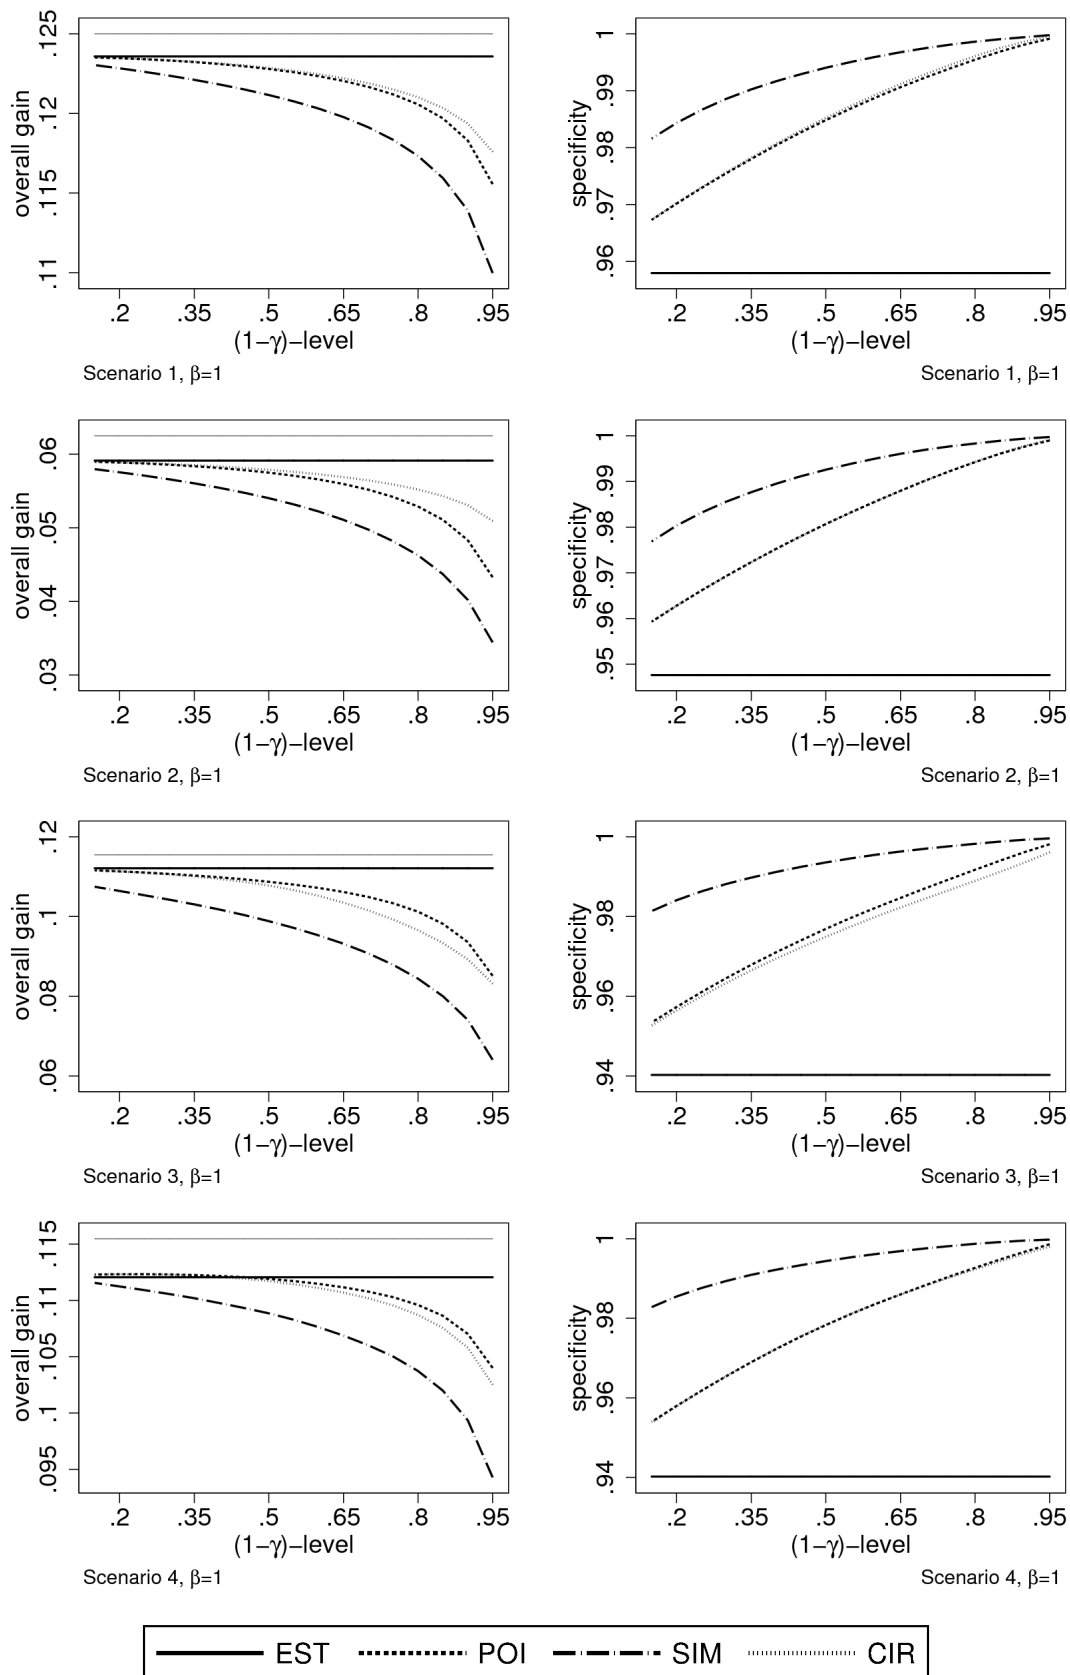

Figure Additional File 6d: Simulation results of overall gain and specificity for  $\beta = 1$  in dependence of the  $(1 - \gamma)$ -level. Shown are all four scenarios individually. The first two scenarios are analysed using a linear model, the latter two using a quadratic model. For the overall gain, the thin grey line indicates the maximally possible overall gain.

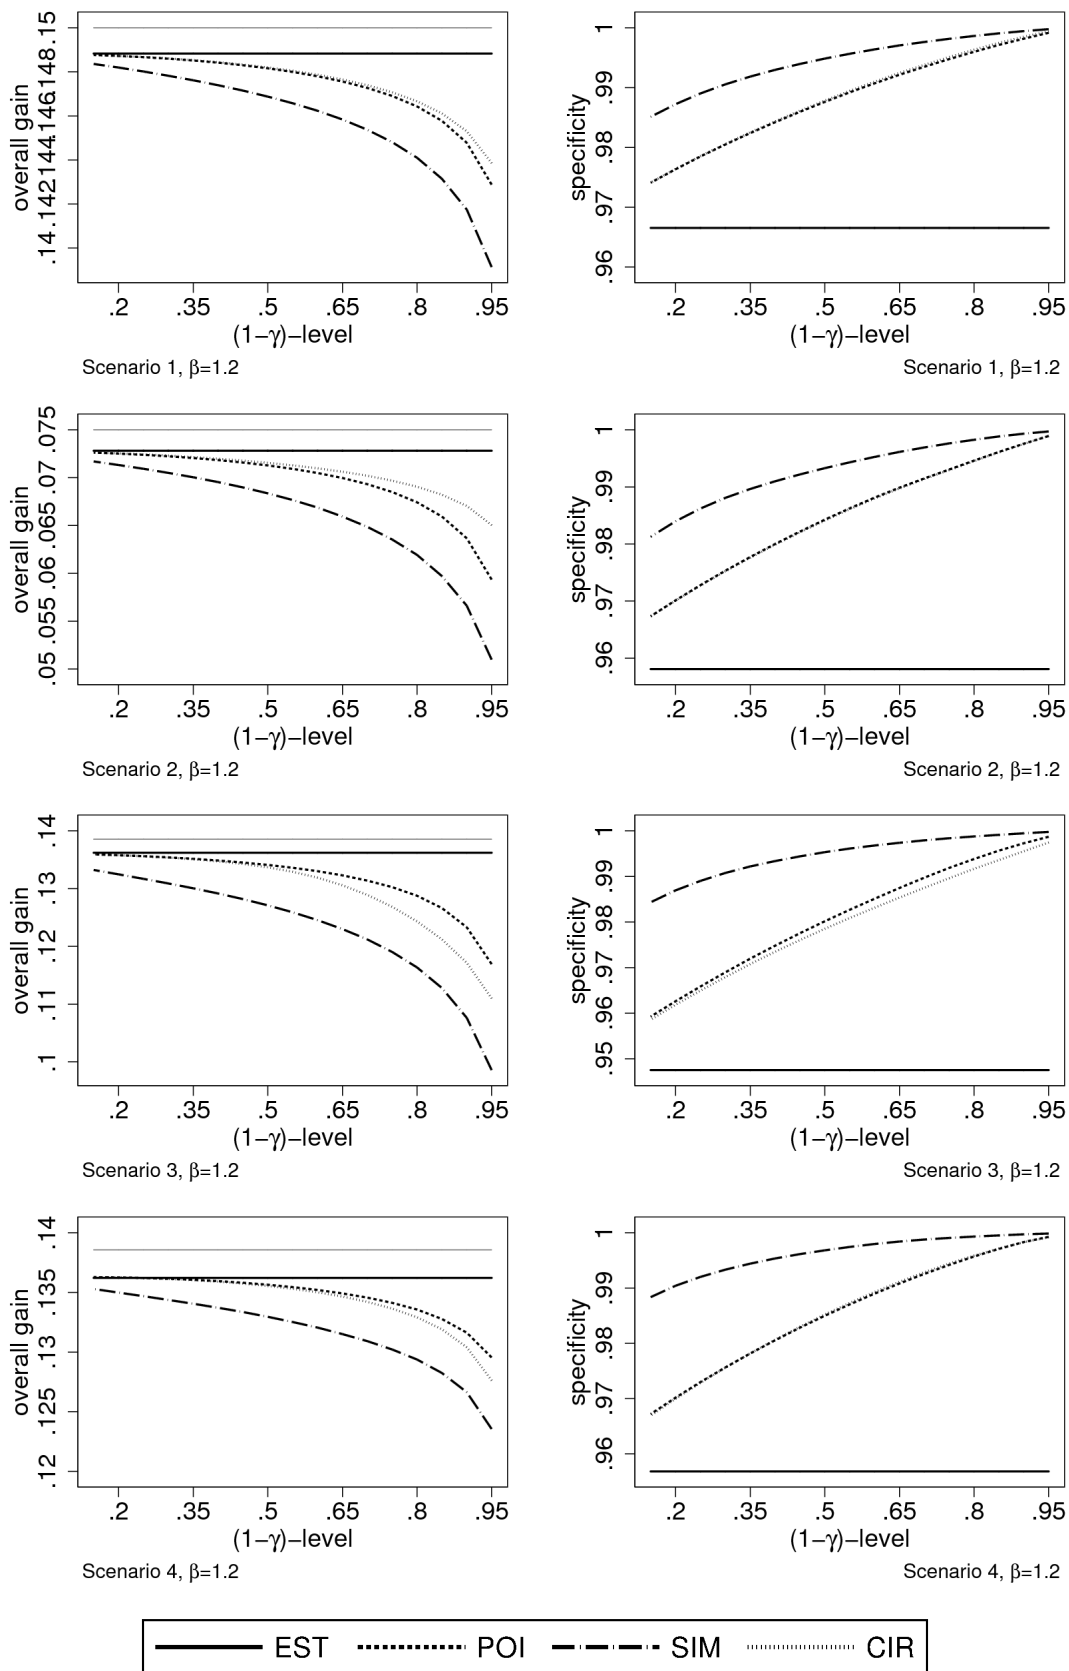

Figure Additional File 6e: Simulation results of overall gain and specificity for  $\beta = 1.2$  in dependence of the  $(1 - \gamma)$ -level. Shown are all four scenarios individually. The first two scenarios are analysed using a linear model, the latter two using a quadratic model. For the overall gain, the thin grey line indicates the maximally possible overall gain.
